# Supplementary material for: Comparative transcriptomics provides novel insights into the mechanisms of selenium accumulation and transportation in tea cultivars (Camellia sinensis (L.) O. Kuntze)
Source: Front Plant Sci. 2023 Oct 2;14:1268537. doi: 10.3389/fpls.2023.1268537 (PMC10577196; doi:10.3389/fpls.2023.1268537)
Supplement: Supplementary file 2 [file Table_1.xlsx]

## Sheet: Sheet1
Supplementary Table 1 Primer sequences of qPCR expression profiles
Gene ID	Tissue	Forward sequence(5'-3')	Reverse sequence(5'-3')
Cha15g006520	Roots	CCTCAATTCTACGCGGCAT	CAAATCCAGAAGTCACGCTCT
Cha01g013100	Roots	GGGCAATGGCTTATTACCTCA	CCAGCAACATACATGCGAAG
Cha09g000740	Roots	CAGATATATGCAATGCCGGTT	GCCACAGCTATGAAGAATGCTA
Cha07g008930	Roots	CTGTGCTGTATATGTACCTCC	TGCTTCATACTCGGCGTCA
Cha06g020540	Roots	GCTGTGAAGAACAACAAGT	TTCATCTTTAGAAAGGCGTTGA
Cha11g013570	Roots	CCAGACTACTTAACAGCCGTA	GTTTTCGCCTTTCAACCAC
Cha01g017880	Roots	GCACCTCCAACATCATTGCTA	TTCATTTCCATACTGTCGAGCAC
Cha09g006110	Roots	GTTCCCGACGACTGACACC	CATTTGTCAAGGCCGTCACCA
Cha07g001700	Roots	ATGAGGTTAGTTCAAAATCGGAA	TGTCAAATGTGCCCAACCA
ChaUn26564.1	Roots	TCGCCTAGCCCATACGTGA	CTATGGATGAGAACCGGCATT
Cha04g014010	Roots	CAACGGCAAATCCATATGTGA	CAAAACCTGGCTTGCGAAC
ChaUn19400.1	Roots	CTCTTCTCCTCAAGTGCAAC	CTCAAGAATGACAAGCGACT
Cha09g013850	Roots	GAAAGCATCCATTGACGCCAT	CATCCAAGTGCAAGGTCCA
Cha05g008700	Leaves	GTTCATCTTTATCTATGCCGTCT	CCACGACACCAGTAGCAAG
Cha02g005640	Leaves	TTCTTGGCAAAGGATCGAGA	CCATTAGAGTTGTTGATCCCC
Cha05g001350	Leaves	CCTCAACTGCCAAATAACCT	GTTATCGGATTCAATTGCCAT
Cha06g017160	Leaves	CATCGTCGGATCAGAAGTCACC	TCCACTACTGCCGTTGAACCC
Cha07g013010	Leaves	TGCCTTTCTGGAACGCCTC	CTTTACAACTGAAGCCGGGTC
Cha05g005000	Leaves	ATGCCCATCTTGATAGCCTT	GACCAACTCAAACAACGGCTT
Cha09g012950	Leaves	TCTGAGATAACTGCGGTCACA	TATAATAGCAGCCGCGCCATC
Cha09g001340	Leaves	TTTCAAGTCGTCGATCATGGC	GGACATATCAAACCGGAGCTT
Cha01g006150	Leaves	CCCAAAGCCCTCTACCTCT	CAATGTCCGTAATTCCATGACC
Cha08g004440	Leaves	CCACGTTTTCCCTCCGACT	GTACACTCCGATAGCCGTGA
Cha15g002810	Leaves	ATTCCTACCTGGTGGCGAAA	GACCATACGCAACCCTAAGCTC
Cha11g014190	Leaves	CCGCAGGCTATTTTAACATTGGA	CAAACTTCTCGTGCAACCTC
Cha11g009160	Leaves	ATTCCGATTTTGAGGCCGTTC	TGTCCATGCTCTTCGTGCTT
