# Supplementary material for: Comparative transcriptomics provides novel insights into the mechanisms of selenium accumulation and transportation in tea cultivars (Camellia sinensis (L.) O. Kuntze)
Source: Front Plant Sci. 2023 Oct 2;14:1268537. doi: 10.3389/fpls.2023.1268537 (PMC10577196; doi:10.3389/fpls.2023.1268537)
Supplement: Supplementary file 3 [file Table_2.xlsx]

## Sheet: Sheet1
Supplementary Table 2 The Na2SeO4-responsive transporters identified in the HSe tea cultivars
Gene ID	Tissue	LSe（log2FC)	XC 4（log2FC)	XC 1（log2FC)	Gene Description
Cha09g005000	Roots	0.619727	1.20162	0.907494	sulfate transporter 1;2
Cha03g006400	Roots	0.0422077	0.954961	0.783733	Probable sulfate transporter 3;4
Cha14g005350	Roots	-0.359177	0.940326	0.88104	Protein NRT1/ PTR FAMILY 7.3
ChaUn22606.1	Roots	0.2246	0.675487	-0.698044	ABC transporter C family member 10
Cha01g020660	Roots	0.20823	-0.715016	-0.703974	Probable polyol transporter 6
Cha04g008910	Roots	0.185978	-0.798904	-1.39221	Metal transporter Nramp5
Cha13g008780	Leaves	0.116248	-0.656086	-1.2298	ABC transporter C family member 4
Cha14g008670	Leaves	0.245193	-0.635296	-0.550766	ABC transporter C family member 10
Cha15g000660	Leaves	-0.115773	-1.16151	-1.33462	Auxin efflux carrier component 1a
Cha03g005640	Leaves	0.50011	-0.722782	-0.605753	ABC transporter C family member 8
Cha05g000840	Leaves	-0.0736772	-0.524999	-1.07304	ABC transporter C family member 14
Cha05g008700	Leaves	0.153927	-0.548243	-0.615114	ABC transporter D family member 1
Cha05g016720	Leaves	-0.0202745	-0.522542	-0.918282	Metal tolerance protein 10
Cha09g016700	Leaves	0.10401	-0.622322	-0.815021	ABC transporter C family member 14
ChaUn15755.1	Leaves	-0.235607	-1.05993	-2.0641	ABC transporter C family member 14
ChaUn19213.3	Leaves	0.285084	-0.729517	-0.590169	Cationic amino acid transporter 1
ChaUn24016.1	Leaves	-0.271008	-0.790848	-0.787731	Inorganic phosphate transporter 1;4
