# Supplementary material for: Comparative transcriptomics provides novel insights into the mechanisms of selenium accumulation and transportation in tea cultivars (Camellia sinensis (L.) O. Kuntze)
Source: Front Plant Sci. 2023 Oct 2;14:1268537. doi: 10.3389/fpls.2023.1268537 (PMC10577196; doi:10.3389/fpls.2023.1268537)
Supplement: Supplementary file 4 [file Table_3.xlsx]

## Sheet: Sheet1
Supplementary Table 3 The Na2SeO3-responsive transporters identified in the HSe tea cultivars
Gene ID	Tissue	LSe（log2FC)	XC 4（log2FC)	XC 1（log2FC)	Gene Description
novel.1992	Roots	0.460891	2.02802	1.36305	ABC transporter C family member 10
Cha01g013100	Roots	-0.163109	2.01372	2.85181	ABC transporter G family member 11
Cha07g008930	Roots	0.572525	1.84395	1.08148	ABC transporter C family member 12
Cha05g012390	Roots	0.380679	-1.5128	-0.60666	ABC transporter G family member 10
Cha04g001030	Roots	-0.588083	-1.18241	-1.71586	ABC transporter B family member 14
ChaUn8425.1	Roots	-0.288253	-1.18885	-1.3911	ABC transporter G family member 15
Cha12g007020	Roots	-0.179296	-0.856203	-0.572145	ABC transporter G family member 32
Cha10g013880	Roots	0.0331664	0.732449	0.509203	ABC transporter B family member 26
novel.2268	Roots	0.600269	1.46767	0.870053	ABC transporter C family member 10
Cha15g006520	Roots	-0.284965	2.91814	1.98872	Phosphate transporter 3;1
Cha14g007250	Roots	-0.486917	-0.723331	-0.622453	Probable sugar phosphate/phosphate translocator At1g12500
Cha05g003300	Roots	-0.450127	-2.56809	-3.30035	Magnesium transporter MRS2-I
Cha05g003260	Roots	-0.935298	-2.2954	-1.94014	Magnesium transporter MRS2-I
Cha05g003270	Roots	-0.400251	-1.25302	-1.60322	Magnesium transporter MRS2-I
ChaUn9582.2	Roots	-0.480114	-0.516292	-0.584095	Magnesium transporter MRS2-2
Cha09g000740	Roots	-0.0985105	1.96559	1.53558	Lysine histidine transporter-like 8
Cha04g011630	Roots	0.747047	1.42317	0.616102	Polyol transporter 5
Cha15g004260	Roots	-0.851605	-1.57172	-0.842373	Protein NRT1/ PTR FAMILY 2.11
ChaUn28963.1	Roots	-0.635018	-3.29223	-2.32939	High affinity nitrate transporter 2.5
Cha02g013540	Roots	-0.351907	-1.29987	-0.952797	Sulfate transporter 1.3
Cha10g009980	Roots	-0.0763488	1.03207	0.538481	Plasma membrane ATPase 4
Cha06g011470	Roots	-0.378569	-0.832358	-0.581866	Sugar carrier protein A
Cha14g010940	Roots	-0.514093	-1.11262	-0.552675	Sugar transport protein 14
Cha14g000170	Roots	-0.359907	-0.847992	-0.505726	Probable folate-biopterin transporter 2
Cha09g008330	Roots	0.45331	0.984503	0.869535	WAT1-related protein At1g43650
Cha07g008070	Roots	0.427566	0.920502	1.56049	Oligopeptide transporter 3
Cha03g014560	Roots	0.252468	0.780036	0.52597	Protein PIN-LIKES 7
Cha07g001610	Roots	0.226868	0.881381	0.570788	Cyclic nucleotide-gated ion channel 1
Cha10g013250	Roots	-0.421521	-0.544368	-0.529836	Equilibrative nucleotide transporter 1
Cha14g013140	Roots	0.0694978	0.552249	0.582116	Adenine nucleotide transporter BT1
Cha15g008910	Roots	-0.292303	-0.696449	-0.527268	Boron transporter 4
Cha06g015130	Roots	-0.264084	-0.946975	-0.823075	Auxin efflux carrier component 3
Cha09g000090	Roots	-0.548889	-0.948345	-0.837384	UDP-galactose transporter 2
Cha07g001170	Roots	-0.212436	-1.05194	-0.719584	Cationic amino acid transporter 5
Cha01g002630	Roots	-0.302855	-1.06033	-0.542831	Vacuolar amino acid transporter 1
Cha08g000920	Roots	-0.421737	-1.07389	-0.674135	Molybdate-anion transporter
Cha01g018760	Roots	-0.705897	-1.19776	-0.851706	Calcium-transporting ATPase 2
Cha01g020660	Roots	-0.314571	-1.14378	-1.86932	Probable polyol transporter 6
novel.4937	Roots	0.288802	-1.16639	-0.638667	Auxin transporter-like protein 3
Cha11g007460	Roots	-0.677928	-1.16647	-0.718134	Potassium transporter 1
Cha01g012030	Roots	0.385139	-2.37572	-0.666103	Potassium channel SKOR
Cha02g015080	Roots	-0.300357	-1.58557	-1.11318	Nucleobase-ascorbate transporter 4
Cha13g005380	Roots	-0.405809	-0.588975	-0.635152	Probable anion transporter 5
Cha04g008910	Roots	-0.238525	-1.7137	-1.55077	Metal transporter Nramp5
Cha14g009580	Roots	0.383798	-1.84772	-1.80838	Metal-nicotianamine transporter YSL3
Cha12g006480	Roots	0.994053	1.18268	1.84568	Protein NRT1/ PTR FAMILY 1.2
Cha01g023160	Roots	-0.482821	-0.786947	-0.623268	ABC transporter B family member 19
Cha07g008940	Roots	-0.0243856	1.11183	0.692355	ABC transporter C family member 2;
Cha14g012510	Roots	-0.00364808	0.799384	1.99501	ABC transporter G family member 14
Cha07g008890	Roots	0.0921583	0.611123	0.504595	ABC transporter C family member 2
Cha03g010500	Roots	-0.640549	0.608267	0.973983	ABC transporter A family member 2
Cha07g008910	Roots	0.359935	0.606303	0.650671	ABC transporter C family member 2
Cha03g010490	Roots	-0.680854	0.563807	0.597307	ABC transporter A family member 7
ChaUn25333.1	Roots	0.184554	0.54744	0.554857	ABC transporter C family member 2
Cha01g015740	Roots	-0.355067	-0.605287	-0.521939	Protein PIN-LIKES 1
Cha12g000210	Roots	0.116251	-0.663368	-0.814709	Metal-nicotianamine transporter YSL1
Cha04g018540	Roots	0.0842268	-0.695113	-0.708028	Probable amino acid permease 7
Cha05g008700	Leaves	-0.336085	-0.545632	-0.776351	ABC transporter D family member 1
Cha14g008670	Leaves	-0.48643	-0.800092	-0.848189	ABC transporter C family member 10
ChaUn10042.3	Leaves	0.377765	1.23008	1.5823	ABC transporter B family member 11
Cha15g004080	Leaves	-1.01055	-1.37798	-0.876716	Nitrate transporter 1.2
ChaUn3495.14	Leaves	-0.597636	1.47416	0.711747	Zinc transporter 3
Cha15g000660	Leaves	-0.526624	-1.06115	-0.974218	Auxin efflux carrier component 1a
Cha10g004610	Leaves	-0.358276	-0.560996	-0.691414	Auxin transporter-like protein 2
Cha09g001900	Leaves	-0.69986	-0.938694	-1.1284	Protein WALLS ARE THIN 1
Cha14g008580	Leaves	-0.316079	-0.530414	-0.551475	Aluminum-activated malate transporter 9
Cha06g019550	Leaves	0.308089	0.535491	0.542269	CTL-like protein DDB_G0274487
Cha07g012320	Leaves	-0.00863282	-0.636055	-0.562358	Equilibrative nucleotide transporter 3
Cha04g004670	Leaves	0.442556	0.548229	0.79474	Amino acid permease 6
Cha06g016240	Leaves	-0.284244	-0.543107	-0.734266	Inorganic phosphate transporter 2-1
Cha02g012850	Leaves	-0.209633	-0.57392	-0.736734	Potassium channel AKT2/3
Cha03g005640	Leaves	-0.262965	-0.962326	-0.597621	ABC transporter C family member 8
Cha01g015740	Leaves	0.171415	0.74419	0.843007	Protein PIN-LIKES 1
Cha04g006410	Leaves	-0.259162	-0.527066	-0.742719	Low affinity sulfate transporter 3
ChaUn4980.1	Leaves	-0.481148	-0.972303	-0.53657	Probable sulfate transporter 3.5
Cha05g015860	Leaves	-0.144551	-0.635768	-0.693666	Probable amino acid permease 7
Cha03g010640	Leaves	-0.168914	-0.811924	-0.921871	Protein NRT1/ PTR FAMILY 2.11
Cha09g008200	Leaves	-0.61723	-0.947486	-1.04932	WAT1-related protein At4g08290
Cha01g011500	Leaves	-0.727235	-0.97752	-0.990632	WAT1-related protein At5g64700
