# Supplementary material for: Comparative transcriptomics provides novel insights into the mechanisms of selenium accumulation and transportation in tea cultivars (Camellia sinensis (L.) O. Kuntze)
Source: Front Plant Sci. 2023 Oct 2;14:1268537. doi: 10.3389/fpls.2023.1268537 (PMC10577196; doi:10.3389/fpls.2023.1268537)
Supplement: Supplementary file 5 [file Table_4.xlsx]

## Sheet: Sheet1
Supplementary Table 4 The Na2SeO3-responsive transcription factors identified in the HSe tea cultivars
Gene ID	Tissue	LSe（log2FC)	XC 4（log2FC)	XC 1（log2FC)	Gene Description
Cha01g008620	Roots	-0.300505	-0.73677	-0.985932	Transcription factor LAF1
Cha01g018530	Roots	0.104927	0.820122	0.616207	AP2-like ethylene-responsive transcription factor ANT
Cha15g009600	Roots	0.0680089	0.654523	0.655726	Transcription factor bHLH68
Cha03g017820	Roots	0.229631	0.813373	0.688246	AP2-like ethylene-responsive transcription factor ANT
Cha08g002530	Roots	-0.228571	-0.806908	-0.742693	Transcription factor LAF1
Cha01g019360	Leaves	-0.162524	0.817659	0.876999	Ethylene-responsive transcription factor ERF008
Cha12g008660	Leaves	-0.399844	0.808832	0.742162	Homeobox-leucine zipper protein ATHB-13
Cha13g000280	Leaves	0.358284	-0.906281	-0.763134	Myb family transcription factor PHL5
Cha03g011930	Leaves	-0.0243098	-0.826998	-0.914269	AP2/ERF and B3 domain-containing transcription factor RAV1
