# Supplementary material for: Comparative transcriptomics provides novel insights into the mechanisms of selenium accumulation and transportation in tea cultivars (Camellia sinensis (L.) O. Kuntze)
Source: Front Plant Sci. 2023 Oct 2;14:1268537. doi: 10.3389/fpls.2023.1268537 (PMC10577196; doi:10.3389/fpls.2023.1268537)
Supplement: Supplementary file 6 [file Table_5.xlsx]

## Sheet: Sheet2
Supplementary Table 5 The Na2SeO3-responsive transcription factors identified in the HSe tea cultivars
Gene ID	Tissue	LSe（log2FC)	XC 4（log2FC)	XC 1（log2FC)	Gene Description
Cha06g020540	Roots	-0.148977	5.09753	3.42481	Probable WRKY transcription factor 75
novel.2230	Roots	0.215524	1.56166	2.18264	Probable WRKY transcription factor 51
Cha07g007410	Roots	-0.0575978	1.83638	1.85609	WRKY transcription factor 42
Cha07g007420	Roots	0.159317	1.70889	2.10932	WRKY transcription factor 6
Cha07g014430	Roots	-0.159977	1.1332	0.868469	WRKY transcription factor 6
Cha08g016990	Roots	0.167179	0.596369	0.922831	WRKY transcription factor 6
ChaUn6730.6	Roots	-0.378872	0.518619	0.807477	WRKY transcription factor WRKY24
Cha08g003880	Roots	-0.473556	-1.25019	0.875779	WRKY transcription factor 70
Cha12g004390	Roots	0.029179	-2.35014	1.32583	Transcription factor MYB39
Cha04g006000	Roots	-0.428002	-1.41519	-0.933388	Transcription factor MYB39
Cha11g013570	Roots	0.751382	4.26475	2.36248	Transcription factor MYB44
Cha01g017880	Roots	0.5214	3.90465	3.17836	Transcription factor MYB75
Cha05g015880	Roots	0.275948	1.67253	1.44257	Transcription factor MYB80
Cha14g010460	Roots	1.16504	1.70769	2.5283	Transcription factor RAX2
Cha11g003270	Roots	-0.449969	-1.10978	-0.684987	Transcription factor TGAL4
Cha05g001550	Roots	-0.301675	-0.83575	-0.593632	Transcription factor bHLH148
ChaUn5051.3	Roots	0.0438996	0.54119	0.562842	Heat stress transcription factor A-4a
Cha12g009240	Roots	-0.117268	0.922476	0.980192	NAC transcription factor 29
Cha04g000270	Roots	0.319587	0.736235	1.02797	bZIP transcription factor 60
Cha06g007590	Roots	0.132209	-1.00355	-0.56813	Ethylene-responsive transcription factor RAP2-11
ChaUn5664.5	Roots	0.432555	0.501081	0.71832	Ethylene-responsive transcription factor ERF118
Cha09g006110	Roots	-0.922196	3.35697	1.49208	Ethylene-responsive transcription factor ERF110
Cha07g001700	Roots	-0.88287	2.975	2.85328	Ethylene-responsive transcription factor 1B
Cha02g008050	Roots	-0.282962	-1.38226	-0.751375	Ethylene-responsive transcription factor WRI1
ChaUn27238.1	Roots	0.479837	1.83701	0.807269	Homeobox-leucine zipper protein ATHB-6
Cha03g019900	Roots	-0.443421	-1.4213	-0.909485	Homeobox-leucine zipper protein HAT7
Cha05g015310	Roots	-0.390996	-0.801876	-1.05462	Nuclear transcription factor Y subunit B-3
Cha12g009020	Roots	-0.12178	-1.70648	-1.25254	Myb family transcription factor PHL8
Cha09g004280	Roots	-0.193396	-0.93477	-0.743695	Agamous-like MADS-box protein AGL21
Cha05g009780	Roots	0.498083	0.814957	0.513703	WRKY transcription factor 6
Cha03g012160	Roots	-0.00401115	2.03464	1.19719	Transcription factor MYB108
Cha04g004870	Roots	0.403468	1.31836	0.955285	Transcription factor bHLH93
Cha14g003390	Roots	0.863395	1.23552	1.25003	Heat shock factor protein HSF30
ChaUn8253.2	Roots	0.0349976	1.59658	0.719636	Ethylene-responsive transcription factor CRF4
Cha01g001420	Leaves	0.243624	0.635391	0.750455	WRKY transcription factor SUSIBA2
Cha14g002200	Leaves	-0.389868	1.55061	1.26215	Ethylene-responsive transcription factor ERF003
Cha02g005640	Leaves	0.0963952	1.03217	1.2672	Homeobox-leucine zipper protein HOX27
Cha05g001350	Leaves	-0.973975	-0.965397	-1.25356	bZIP transcription factor 53
Cha05g013360	Leaves	-0.516407	-1.58347	-1.33529	Transcription factor bHLH123
Cha15g010060	Leaves	-1.16775	1.04682	1.16288	Transcription factor bHLH87
Cha07g013010	Leaves	-0.446911	-0.62034	-0.685435	Transcription factor bHLH112
Cha06g017160	Leaves	0.0100624	0.56551	0.606092	Transcription factor MYB1R1
Cha11g000850	Leaves	-0.0918274	1.36329	0.812502	Transcription factor MYB12
ChaUn9861.2	Leaves	-0.436523	-0.558939	-0.616886	Nuclear transcription factor Y subunit C-3
Cha01g013960	Leaves	-0.882376	-1.32545	-0.996297	Nuclear transcription factor Y subunit B-3
Cha11g011440	Leaves	0.455421	0.722873	1.11028	Basic helix-loop-helix protein A [Pisum sativum]
Cha12g008660	Leaves	0.231603	0.717196	0.665214	Homeobox-leucine zipper protein ATHB-13
Cha08g000690	Leaves	0.583964	0.653217	1.099	Growth-regulating factor 7
