# Supplementary material for: Comparative transcriptomics provides novel insights into the mechanisms of selenium accumulation and transportation in tea cultivars (Camellia sinensis (L.) O. Kuntze)
Source: Front Plant Sci. 2023 Oct 2;14:1268537. doi: 10.3389/fpls.2023.1268537 (PMC10577196; doi:10.3389/fpls.2023.1268537)
Supplement: Supplementary file 7 [file Table_6.xlsx]

## Sheet: Sheet1
Supplementary Table 6 Genes involved in the glutathione metabolic pathway in the roots of tissue-specific HSe tea cultivars
Gene ID	LSe（log2FC)	XC 4（log2FC)	XC 1（log2FC)	Gene Description
Cha06g010870	-0.266083	1.29327	1.27534	Probable glutathione S-transferase
Cha10g007850	0.309681	1.57945	1.17674	Glutathione S-transferase F9
Cha08g013600	0.133664	0.584799	0.531475	Probable glutathione S-transferase
Cha01g004750	0.0646444	0.93814	0.967225	Glutathione S-transferase U18
ChaUn13713.3	-0.201213	1.62114	0.925745	Probable glutathione S-transferase
Cha06g010550	0.0465636	1.49476	0.615932	Glutathione synthetase, chloroplastic
Cha08g013700	0.479449	1.32239	0.98398	Glutathione S-transferase U25
Cha03g008580	0.0678236	-1.15826	-0.591127	Ribonucleoside-diphosphate reductase small chain
Cha06g018130	-0.421728	-0.537807	-0.501197	6-phosphogluconate dehydrogenase
ChaUn19400.1	0.200041	2.52921	2.41581	Probable glutathione S-transferase
ChaUn26564.1	-1.27714	4.70579	2.65961	Glutathione S-transferase U18
Cha04g014010	-0.10878	3.84695	2.14444	Probable glutathione S-transferase parA
Cha06g019020	0.213834	2.46197	1.93191	Glutathione S-transferase U17
Cha10g006290	0.83014	1.91713	1.46314	Glutathione S-transferase L3
Cha09g013850	-0.186764	2.39312	2.28731	Glutathione S-transferase U8
Cha08g013650	0.30856	1.04704	1.35305	Probable glutathione S-transferase
